# Supplementary material for: Rippled β-Sheet Formation by an Amyloid-β Fragment Indicates Expanded Scope of Sequence Space for Enantiomeric β-Sheet Peptide Coassembly
Source: PubMed Central journal article supplement (PMC6571685; doi:10.3390/molecules24101983), 2019-05-23

# Rippled $\beta$ -sheet formation by an amyloid- $\beta$ fragment suggests the generality of enantiomeric $\beta$ -sheet peptide coassembly

*Jennifer M. Urban,<sup>1</sup> Janson Ho,<sup>1</sup> Gavin Piester,<sup>1</sup> Riqiang Fu,<sup>2</sup> and Bradley L. Nilsson<sup>1\*</sup>*

<sup>1</sup>Department of Chemistry, University of Rochester, Rochester, NY 14627-0216

<sup>2</sup>The National High Magnetic Field Laboratory, Florida State University, 1800 East Paul Dirac Drive, Tallahassee, FL 32310

email: [bradley.nilsson@rochester.edu](mailto:bradley.nilsson@rochester.edu); Fax: (585) 276-0205; Tel: (585) 276-3053

## SUPPLEMENTARY MATERIAL

### Contents:

|                                                                               |             |
|-------------------------------------------------------------------------------|-------------|
| <b>Table S1.</b> Analytical HPLC gradient conditions .....                    | page S2     |
| <b>Figure S1.</b> Analytical HPLC traces .....                                | page S2-4   |
| <b>Table S2.</b> Calculated and observed $m/z$ values (MALDI-TOF-MS).....     | page S4     |
| <b>Figure S2.</b> MALDI-TOF-MS spectra.....                                   | page S5-7   |
| <b>Figure S3.</b> Peptide concentration curves.....                           | page S8     |
| <b>Figure S4.</b> TEM images of peptide fibrils used for solid state NMR..... | page S9-S10 |
| <b>Figure S5.</b> Raw ssNMR data for the L/L- and L/D- assemblies.....        | page S11    |

**Table S1.** Analytical HPLC gradient conditions

| Peptide                                        | Sequence                                                 | Retention Time (min) | Gradient (soln A: water/0.5% TFA; soln B: acetonitrile/0.5% TFA) |
|------------------------------------------------|----------------------------------------------------------|----------------------|------------------------------------------------------------------|
| L-A $\beta$ (16-22)                            | Ac-KLVFFAE-NH <sub>2</sub>                               | 12.55                | Isocratic 5% B 5 min, 5-95% B over 10 min, 95% B 5 min           |
| D-A $\beta$ (16-22)                            | Ac-klvffae-NH <sub>2</sub>                               | 12.55                | Isocratic 5% B 5 min, 5-95% B over 10 min, 95% B 5 min           |
| L17/F20 <sup>13</sup> C<br>L-A $\beta$ (16-22) | Ac-K <sup>13</sup> LVF <sup>13</sup> FAE-NH <sub>2</sub> | 12.55                | Isocratic 5% B 5 min, 5-95% B over 10 min, 95% B 5 min           |
| F19 <sup>13</sup> C<br>L-A $\beta$ (16-22)     | Ac-KLV <sup>13</sup> FFAE-NH <sub>2</sub>                | 12.35                | Isocratic 5% B 5 min, 5-95% B over 10 min, 95% B 5 min           |
| F20 4F-Phe<br>L-A $\beta$ (16-22)              | Ac-KLVF(4F-Phe)AE-NH <sub>2</sub>                        | 12.43                | Isocratic 5% B 5 min, 5-95% B over 10 min, 95% B 5 min           |
| F20 D-4F-phe<br>D-A $\beta$ (16-22)            | Ac-klvf(4F-phe)AE-NH <sub>2</sub>                        | 12.43                | Isocratic 5% B 5 min, 5-95% B over 10 min, 95% B 5 min           |

**Figure S1.** Analytical HPLC traces of synthetic peptides at 215 nm.

**A.** L-A $\beta$ (16-22), Ac-KLVFFAE-NH<sub>2</sub>

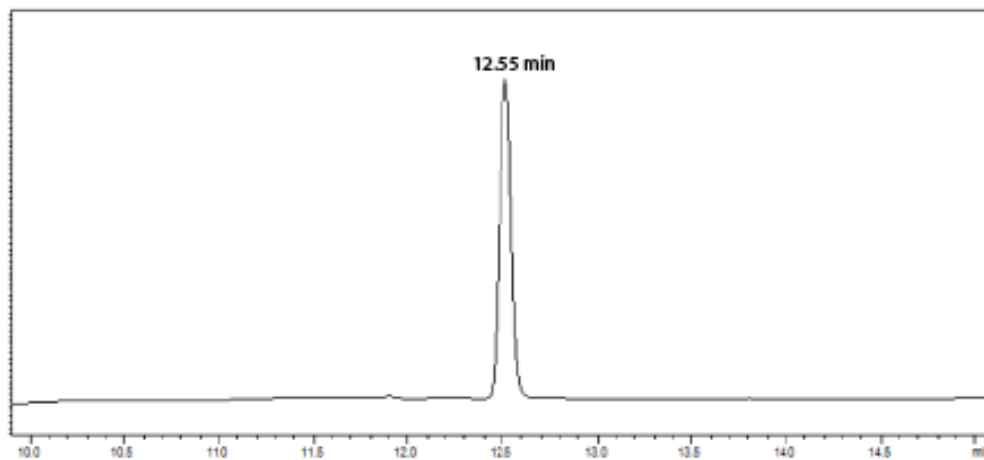

**B. D-A $\beta$ (16-22), Ac-klvffae-NH<sub>2</sub>**

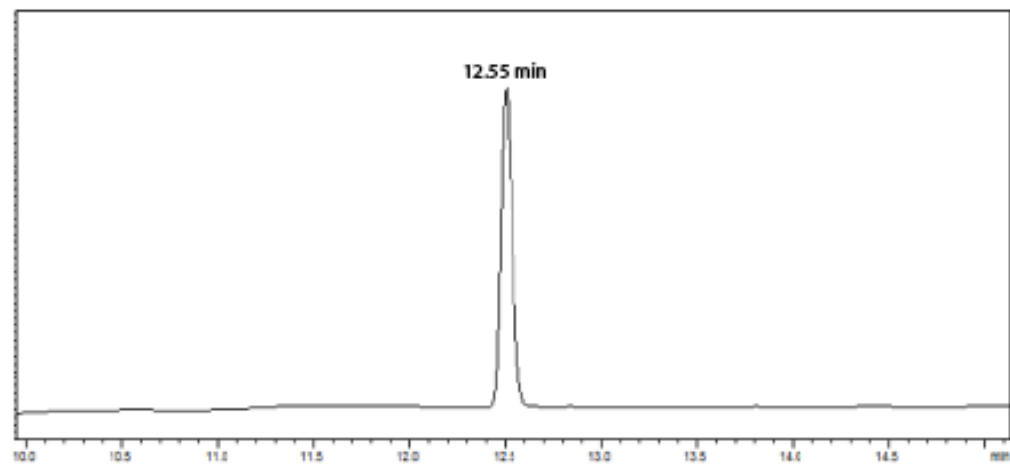

**C. L17/F20 <sup>13</sup>C L-A $\beta$ (16-22), Ac-K<sup>13</sup>LVF<sup>13</sup>FAE-NH<sub>2</sub>**

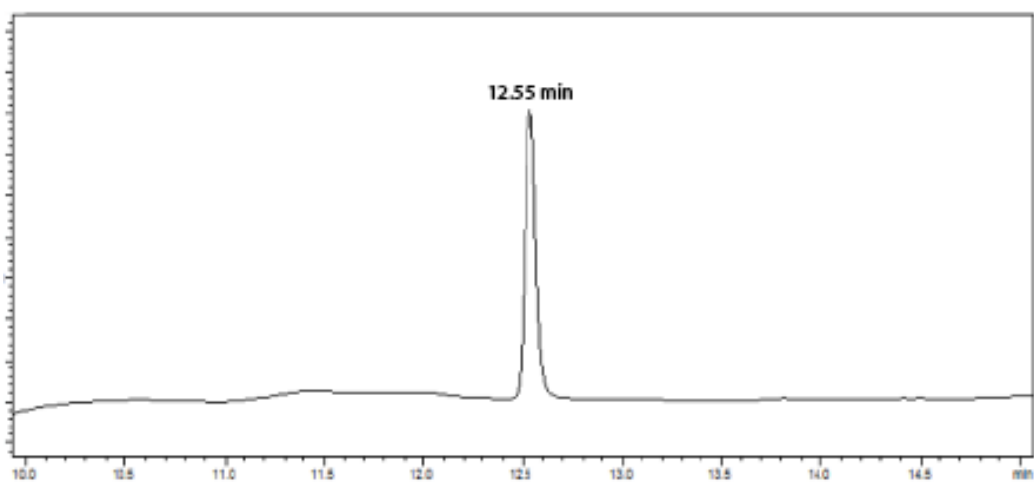

**D. F19 <sup>13</sup>C L-A $\beta$ (16-22), Ac-KLV<sup>13</sup>FFAE-NH<sub>2</sub>**

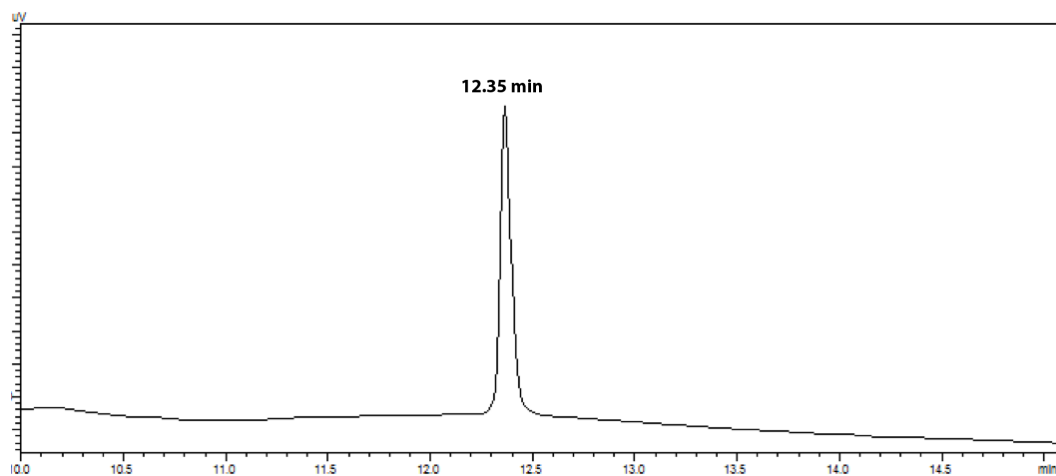

**E. F20 4F-Phe L-A $\beta$ (16-22), Ac-KLVF(4F-Phe)AE-NH<sub>2</sub>**

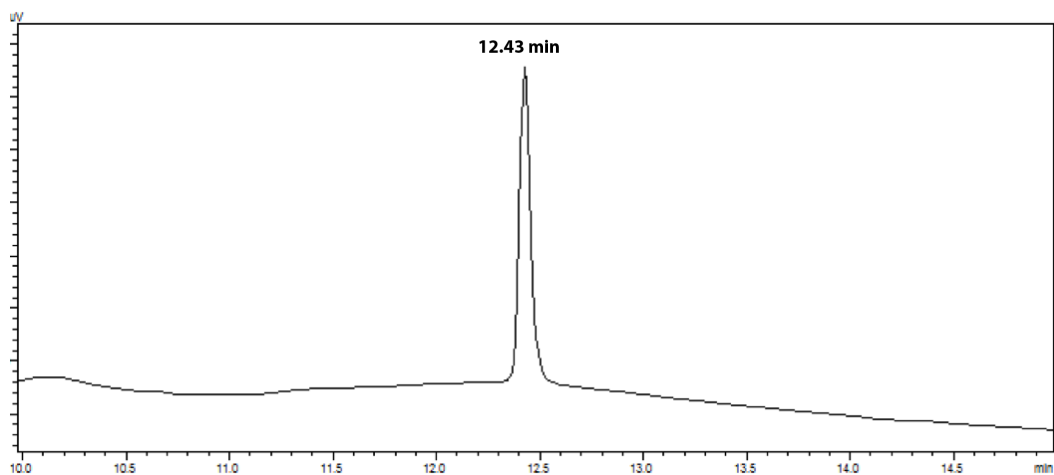

**F. F20 D-4F-phe D-A $\beta$ (16-22), Ac-klvf(4F-phe)AE-NH<sub>2</sub>**

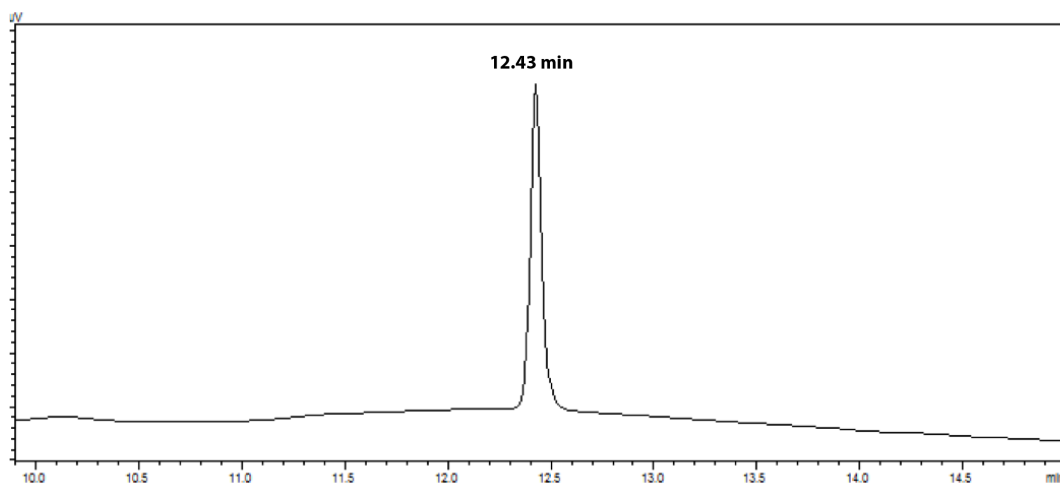

**Table S2.** Calculated and observed  $m/z$  for all peptides by MALDI-TOF-MS.

| Peptide                                        | calc<br>[MH <sup>+</sup> ] | obs<br>[MH <sup>+</sup> ] | calc<br>[MNa <sup>+</sup> ] | obs<br>[MNa <sup>+</sup> ] | calc<br>[MK <sup>+</sup> ] | obs<br>[MK <sup>+</sup> ] |
|------------------------------------------------|----------------------------|---------------------------|-----------------------------|----------------------------|----------------------------|---------------------------|
| L-A $\beta$ (16-22)                            | 895.07                     | 895.175                   | 917.07                      | 917.191                    | 933.17                     | 933.180                   |
| D-A $\beta$ (16-22)                            | 895.07                     | 894.693                   | 917.07                      | 916.685                    | 933.17                     | 932.671                   |
| L17/F20 <sup>13</sup> C<br>L-A $\beta$ (16-22) | 897.05                     | 896.834                   | 919.05                      | 918.835                    | 935.15                     | 934.821                   |
| F19 <sup>13</sup> C<br>L-A $\beta$ (16-22)     | 896.06                     | 896.311                   | 918.06                      | 918.340                    | 934.16                     | 934.335                   |
| F20 4F-Phe<br>L-A $\beta$ (16-22)              | 913.06                     | 913.494                   | 935.06                      | 935.522                    | 951.16                     | 951.523                   |

|                                     |        |         |        |         |        |         |
|-------------------------------------|--------|---------|--------|---------|--------|---------|
| F20 D-4F-phe<br>D-A $\beta$ (16-22) | 913.06 | 913.497 | 935.06 | 935.532 | 951.16 | 951.530 |
|-------------------------------------|--------|---------|--------|---------|--------|---------|

**Figure S2.** MALDI-TOF spectra for all peptides.

**A. L-A $\beta$ (16-22), Ac-FKLVFFAE-NH<sub>2</sub>**

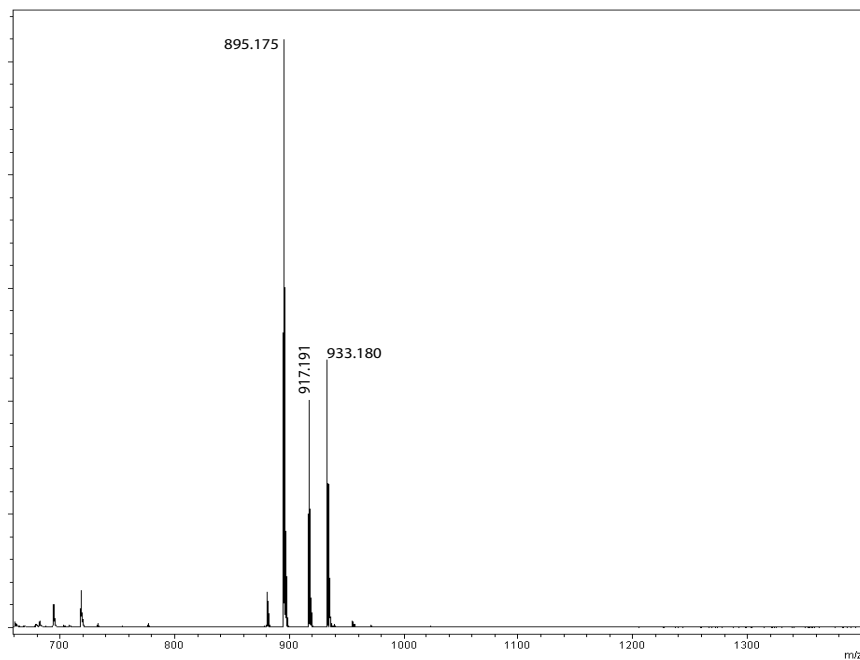

**B. D-A $\beta$ (16-22), Ac-klvffae-NH<sub>2</sub>**

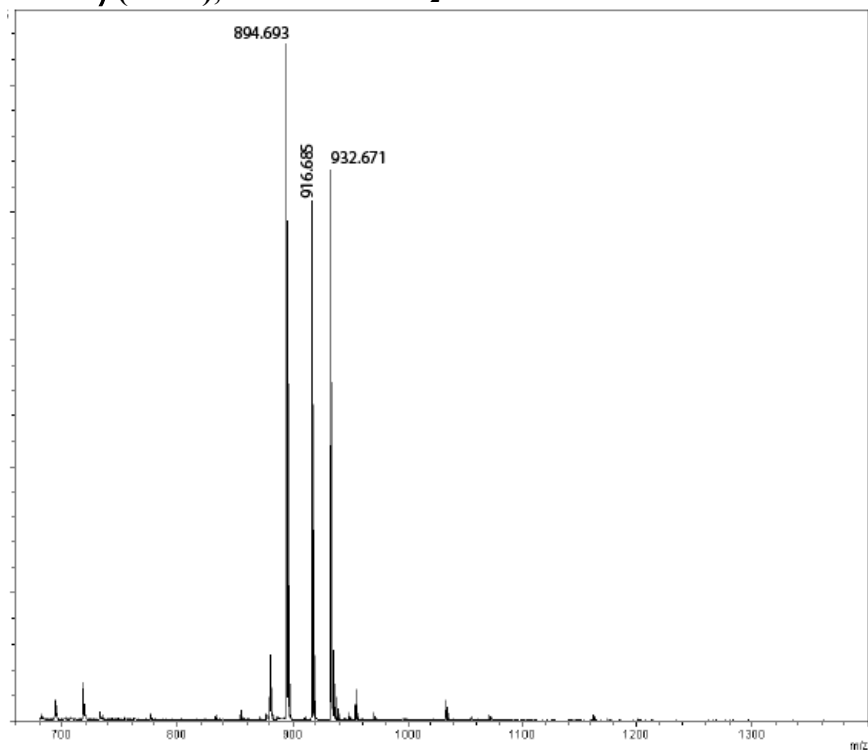

**C. L17/F20  $^{13}\text{C}$  L-A $\beta$ (16-22), Ac-K $^{13}\text{LVF}^{13}\text{FAE-NH}_2$**

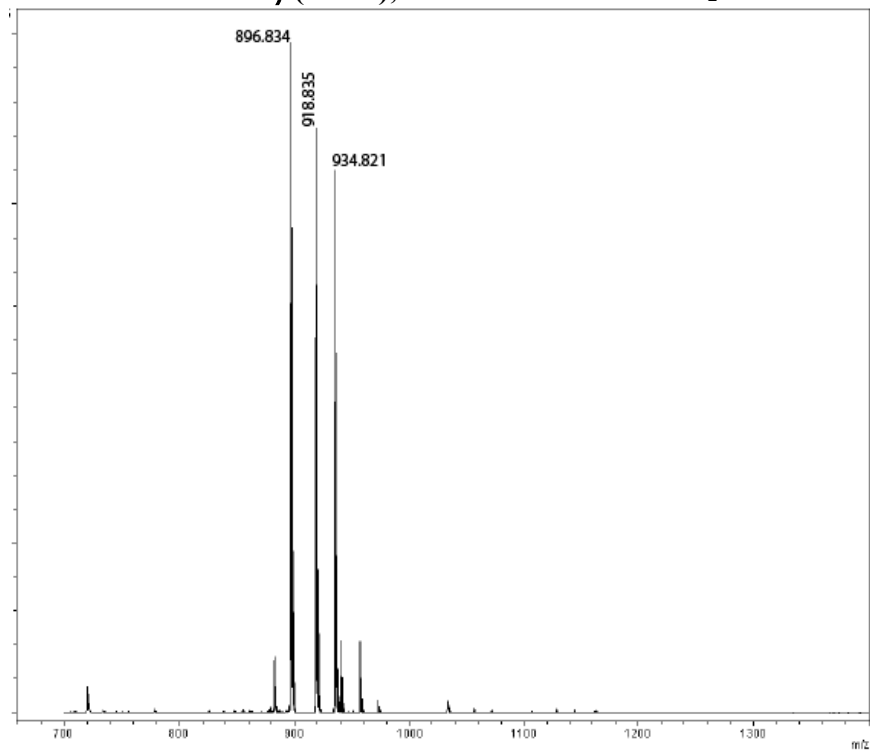

**D. F19  $^{13}\text{C}$  L-A $\beta$ (16-22), Ac-KLV $^{13}\text{FFAE-NH}_2$**

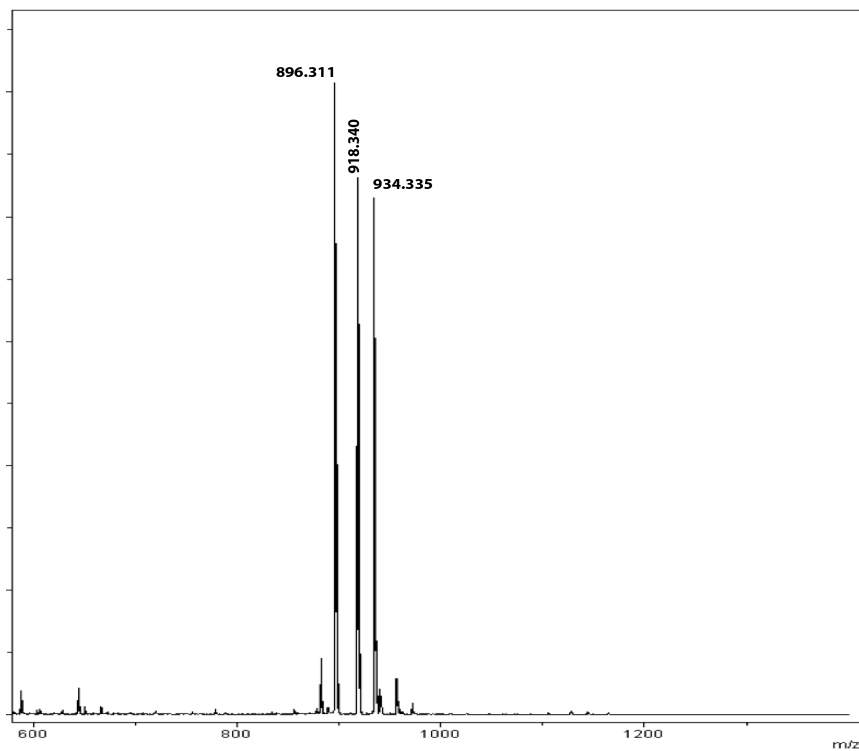

**E. F20 4F-Phe L-A $\beta$ (16-22), Ac-KLVF(4F-Phe)AE-NH<sub>2</sub>**

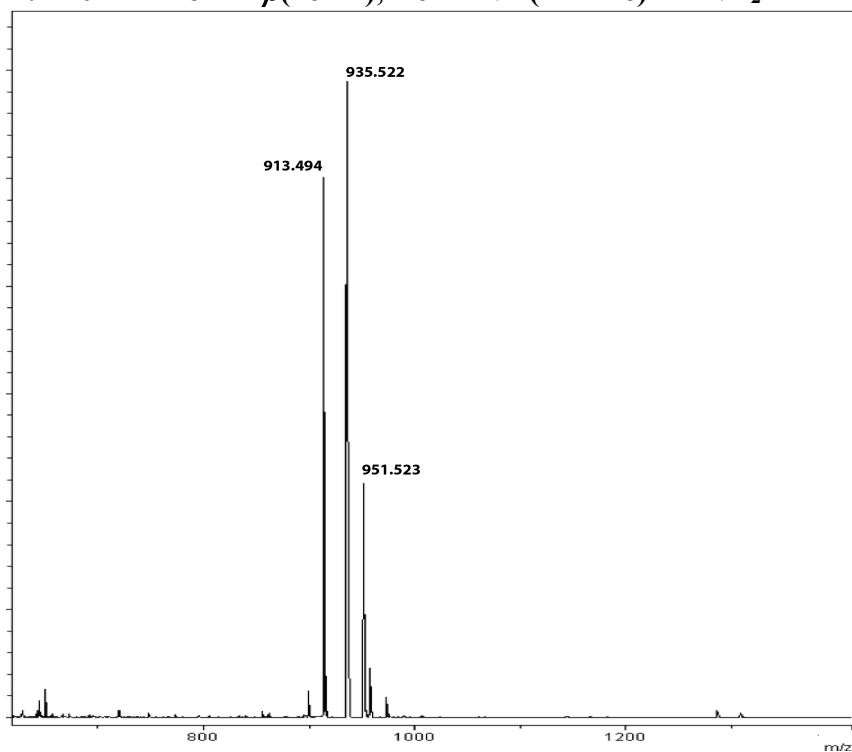

**F. F20 D-4F-phe D-A $\beta$ (16-22), Ac-klvf(4F-phe)AE-NH<sub>2</sub>**

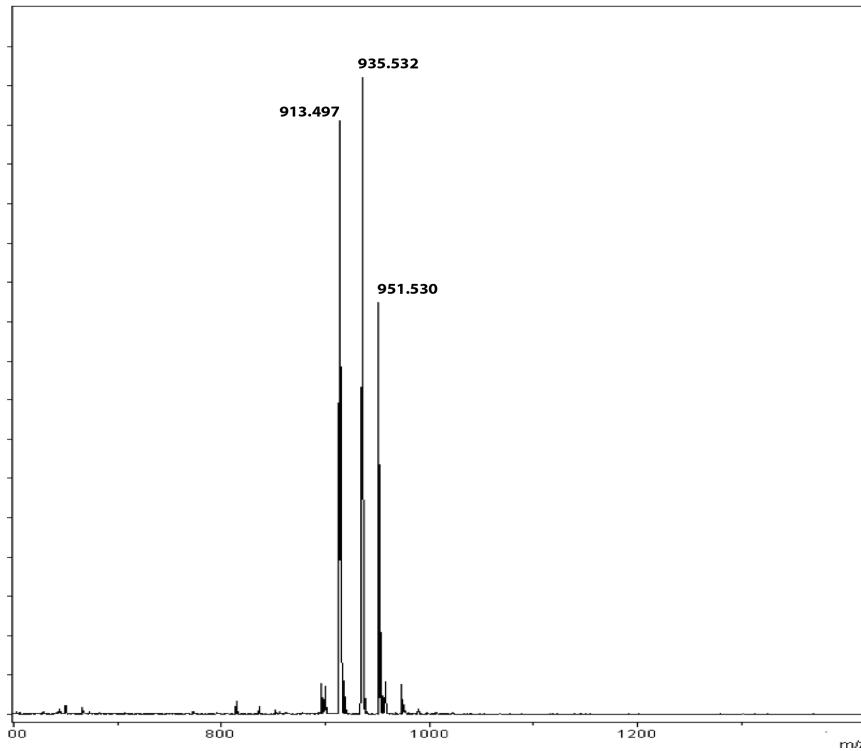

**Figure S3.** Peptide concentration curves used to determine concentrations of all peptides used in this study.

**A. Concentration curve used for all peptides *except* those containing 4F-Phe**

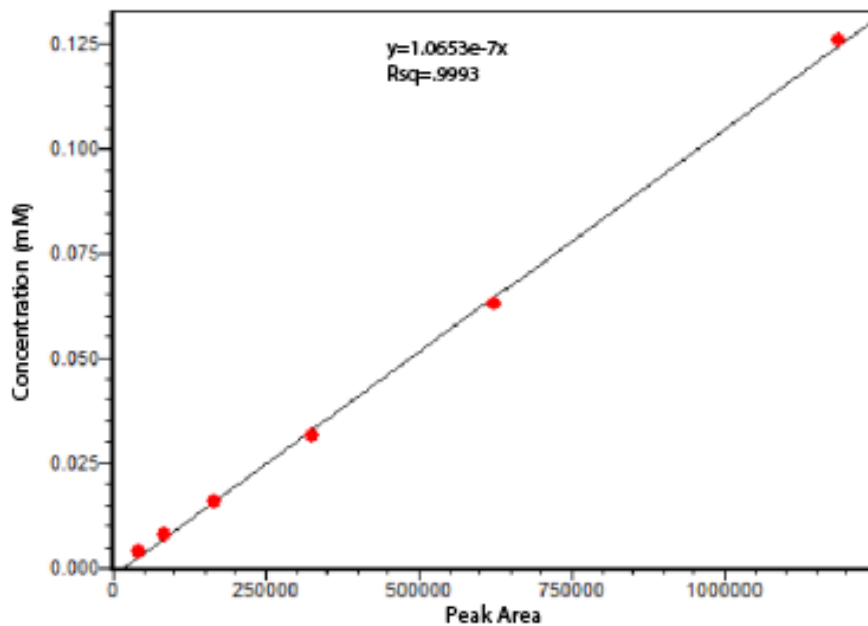

**B. Concentration curve used for peptides containing 4F-Phe**



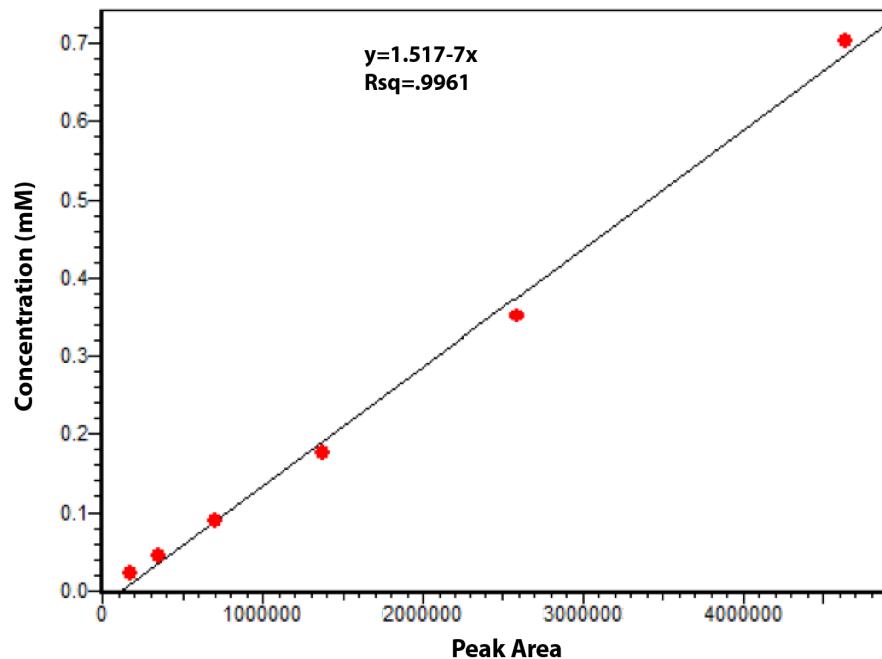

**Figure S4.** Transmission electron micrographs of peptide fibrils used for solid state NMR.

**A.** F20 4F-Phe L-A $\beta$ (16-22), Ac-KLVF(4F-Phe)AE-NH<sub>2</sub>

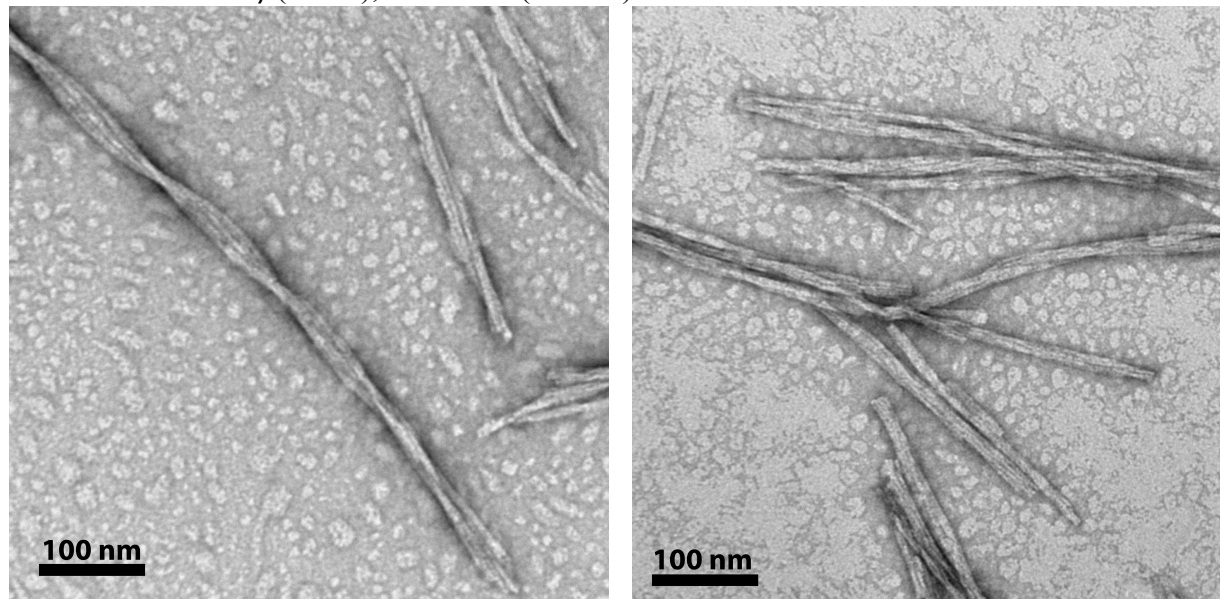

**B.** TEM images of the L/L-ssNMR sample: F19 <sup>13</sup>C L-A $\beta$ (16-22) (Ac-KLV<sup>13</sup>FFAE-NH<sub>2</sub>) with F20 4F-Phe L-A $\beta$ (16-22) (Ac-KLVF(4F-Phe)AE-NH<sub>2</sub>).

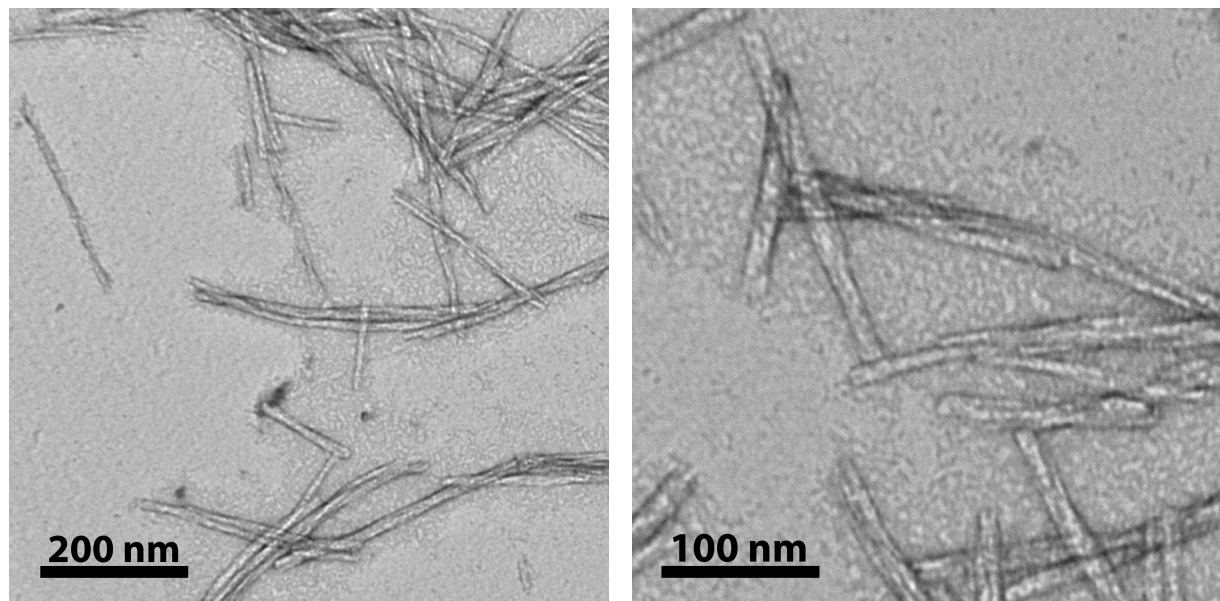

C. TEM images for the L/D-ssNMR sample: F19  $^{13}\text{C}$  L-A $\beta$ (16-22) (Ac-KLV $^{13}\text{F}$ FAE-NH $_2$ ) with F20 D-4F-phe D-A $\beta$ (16-22) (Ac-klvf(4F-phe)AE-NH $_2$ ).

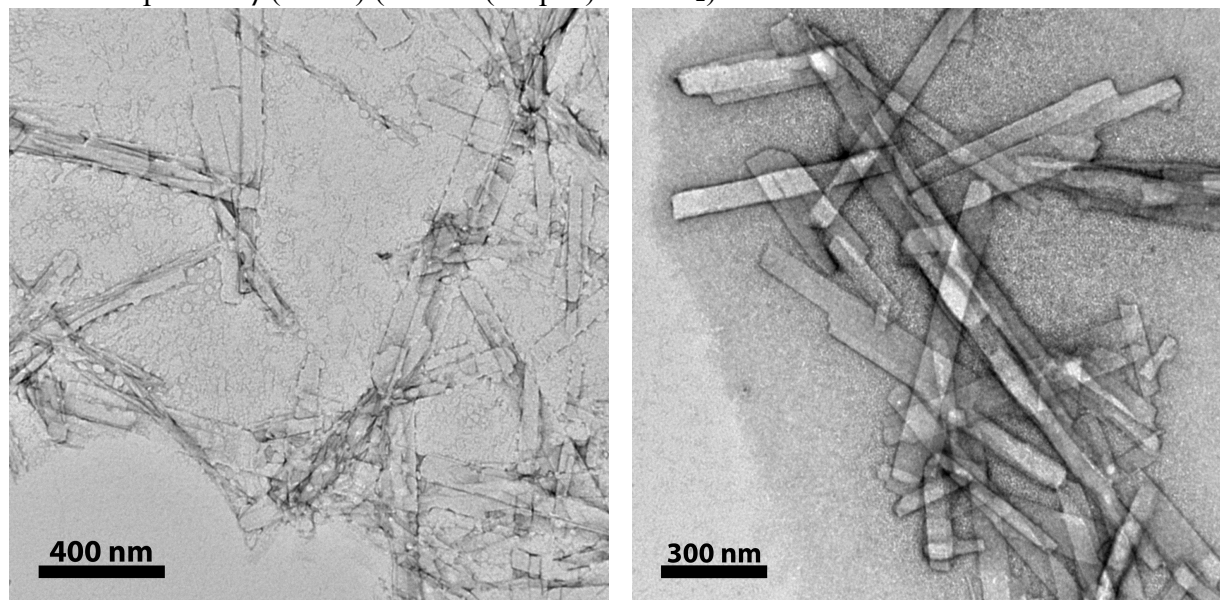

**Figure S5.** Carbon-13 ssNMR 1D spectra for the L/L- and L/D- A $\beta$ (16-22) assemblies.

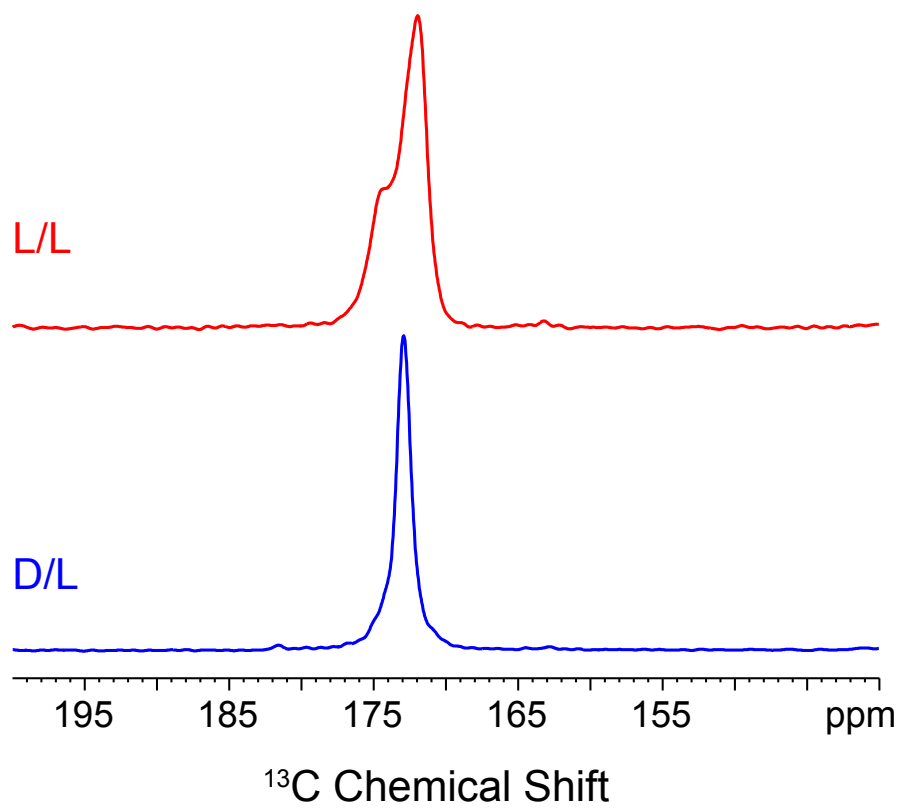

Supplement: molecules-24-01983-s001.pdf [file molecules-24-01983-s001.pdf]
